# Supplementary material for: Usability, Perceived Usefulness, and Shared Decision-Making Features of the AFib 2gether Mobile App: Protocol for a Single-Arm Intervention Study
Source: PubMed Central journal article supplement (PMC7946587; doi:10.2196/21986), 2021-02-24
Supplement: resprot_v10i2e21986_app1.pdf [file resprot_v10i2e21986_app1.pdf]

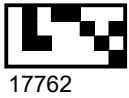

17762

# Assessment of Provider Knowledge and Therapeutic Approaches for Reducing Stroke Risk in Patients with Nonvalvular Atrial Fibrillation.

Any responses provided will be kept CONFIDENTIAL. Your participation is voluntary. All responses will be combined, and the information you provide will remain ANONYMOUS. Our facility may use a 3rd party to collate and report data from your responses. Completion of this form provides permission to do this. Please completely shade in each response oval that you select. Shade ovals like this . In the boxes, print neatly and write only 1 digit per box, for example:  . Thank you for your participation!

Healthcare Professional Type:

Physician     PA     NP     Nurse     Pharmacist

Other-Describe:

Practice Area:  Cardiology     Hematology     Family Medicine     Neurology     Internal Medicine     Geriatrics

General Practice     Clinical Cardiac Electrophysiology     Interventional Cardiology

Other:

Practice Setting: (Check all that apply)

Group Practice     Hospital/IDS     Outpatient Clinic     Inpatient Clinic     Long-Term Care     Anticoagulation Clinic

Medical School

Other:

How long have you been in practice (in years):

Approximately what percentage of your adult patients has a diagnosis of NVAF? (Mark one only):

None     1-10     11-25     26-50     51+     Don't know

### **Confidence in Managing Patients with NVAF**

| In managing patients with NVAF:                                                                                                               | Not confident         | Somewhat confident    | Moderately confident  | Very confident        |
|-----------------------------------------------------------------------------------------------------------------------------------------------|-----------------------|-----------------------|-----------------------|-----------------------|
| 1. How confident are you in using information about stroke risk and bleeding risk assessment to determine appropriate antithrombotic therapy? | <input type="radio"/> | <input type="radio"/> | <input type="radio"/> | <input type="radio"/> |
| 2. How confident are you in selecting appropriate anticoagulant therapy?                                                                      | <input type="radio"/> | <input type="radio"/> | <input type="radio"/> | <input type="radio"/> |
| 3. How confident are you in using oral anticoagulant therapies for reducing the risk of stroke?                                               | <input type="radio"/> | <input type="radio"/> | <input type="radio"/> | <input type="radio"/> |
| 4. How confident or familiar are you in using CHA <sub>2</sub> DS <sub>2</sub> -VASc scores to assess stroke risk?                            | <input type="radio"/> | <input type="radio"/> | <input type="radio"/> | <input type="radio"/> |
| 5. How confident are you in applying ACC/AHA/HRS guidelines to the management of NVAF?                                                        | <input type="radio"/> | <input type="radio"/> | <input type="radio"/> | <input type="radio"/> |
| 6. How confident or familiar are you in using HAS-BLED score to assess bleeding risk?                                                         | <input type="radio"/> | <input type="radio"/> | <input type="radio"/> | <input type="radio"/> |

Form ID:

Site ID:

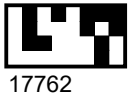

**Knowledge of NVAF Management**

7a. What CHA<sub>2</sub>DS<sub>2</sub>-VASc<sub>2</sub> score would you give for the following patient case?

JD is a 73yo male with HTN and CHF. His BP is 165/90. He has no history of a stroke or thromboembolic event.

- CHA<sub>2</sub>DS<sub>2</sub>VASc=1     CHA<sub>2</sub>DS<sub>2</sub>VASc=2     CHA<sub>2</sub>DS<sub>2</sub>VASc=3  
 CHA<sub>2</sub>DS<sub>2</sub>VASc=4     CHA<sub>2</sub>DS<sub>2</sub>VASc=5     I don't know the CHA<sub>2</sub>DS<sub>2</sub>-VASc score

7b. Which antithrombotic would you choose for this patient (choose all that apply)?

- No therapy     Aspirin 81mg     Vitamin K Antagonist (VKA)     Direct Oral Anticoagulant (DOAC)

8. According to the current ACC/AHA/HRS guidelines, in which of the following NVAF patients over 65 years of age is aspirin alone an acceptable option for anticoagulation? (choose all that apply)

- Individuals with diabetes     Female gender     Individuals with previous stroke or TIA  
 Individuals with heart failure     None of the above     Unsure

9. Please rate your knowledge with the following anticoagulant therapeutic classes in terms of their potential use in NVAF patients at risk for stroke:

|                                      | Not at all Familiar   | Somewhat Familiar     | Very Familiar         |
|--------------------------------------|-----------------------|-----------------------|-----------------------|
| 1. Vitamin K Antagonists (VKA)?      | <input type="radio"/> | <input type="radio"/> | <input type="radio"/> |
| 2. Direct Oral Anticoagulant (DOAC)? | <input type="radio"/> | <input type="radio"/> | <input type="radio"/> |
